# Supplementary material for: Alcohol Exposure Decreases CREB Binding Protein Expression and Histone Acetylation in the Developing Cerebellum
Source: PLOS journal article supplement (doi:10.1371/journal.pone.0019351), 2011-05-31

Supplemental Figure S1

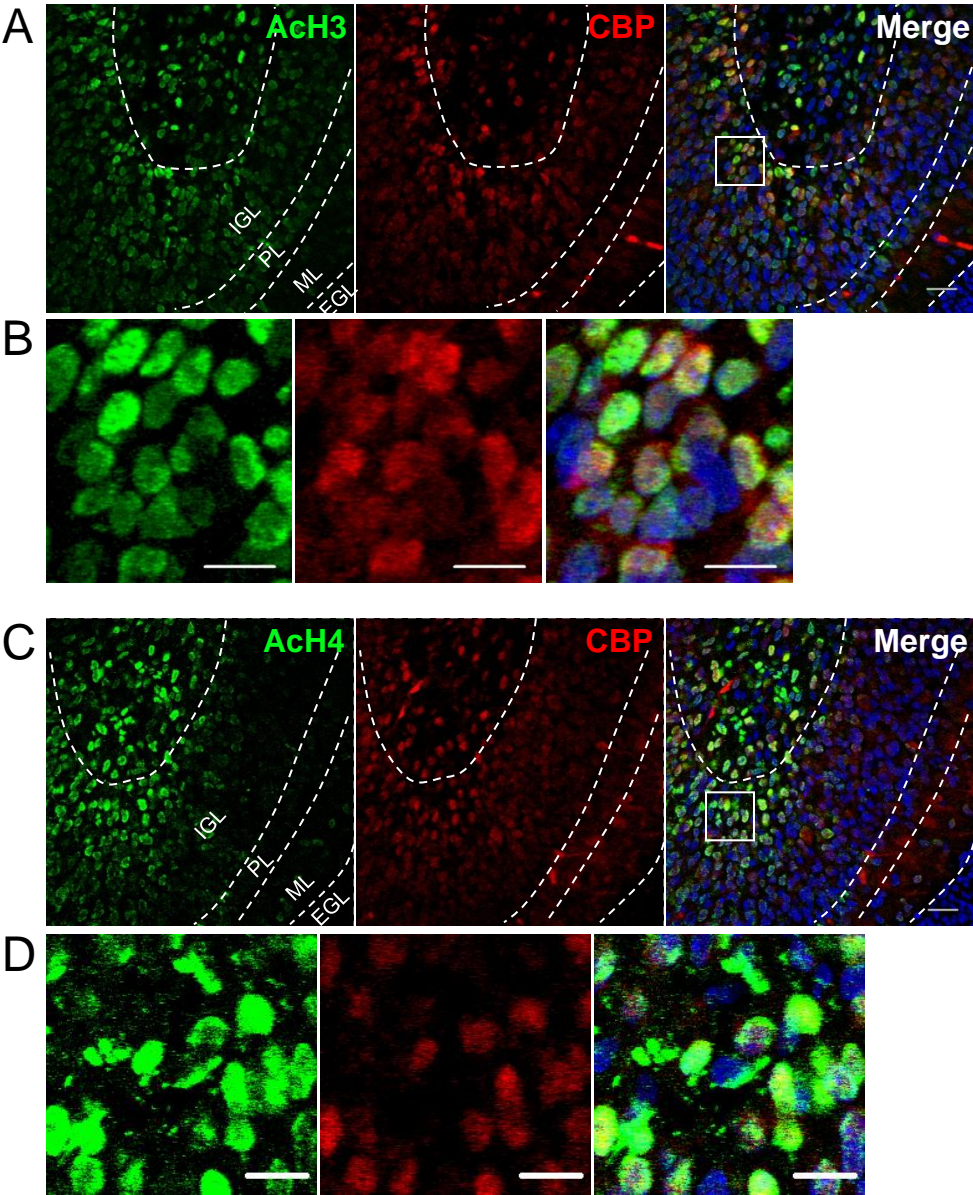

Supplement: S1 (10.1371/journal.pone.0019351.s001) [file journal.pone.0019351.s001]
